# Supplementary material for: Matrix dependency of baddeleyite U–Pb geochronology by femtosecond-LA-ICP-MS and comparison with nanosecond-LA-ICP-MS
Source: Royal Society of Chemistry journal article supplement (doi:10.1039/c7ja00403f), 2018-01-01
Supplement: c7ja00403f1.xlsx [file c7ja00403f1.xlsx]

## Sheet: Sheet1
Supplementary table A: Isotope ratios and age data for the Phalaborwa analyses from this study. Abbreviations in the data points are: ns = nanosecond laser; fs = femtosecond laser analyses; spot = spot analyses; line = line analyses; Ples = Plesovice zircon as reference material; 5z = FC5z zircon as reference material; 4b = FC4b baddeleyite as reference material.
	207/235	± 2σ	206/238	± 2σ	Error Correlation	207/235 [Ma]	± 2σ	206/238 [Ma]	± 2σ
ns-spot-Ples-1	8.65	0.46	0.487	0.025	0.83416	2285	47	2540	110
ns-spot-Ples-2	8.76	0.65	0.498	0.036	0.84729	2298	62	2580	150
ns-spot-Ples-3	7.12	0.47	0.405	0.028	0.75223	2131	49	2184	120
ns-spot-Ples-4	8.03	0.56	0.466	0.032	0.93101	2216	56	2450	140
ns-spot-Ples-5	6.92	0.7	0.399	0.04	0.8567	2089	67	2160	160
ns-spot-Ples-6	7.86	0.49	0.447	0.029	0.71524	2204	51	2374	120
ns-spot-Ples-7	7.14	0.57	0.417	0.028	0.79538	2106	61	2230	120
ns-spot-Ples-8	6.93	0.64	0.396	0.035	0.75117	2091	63	2145	140
ns-spot-Ples-9	8.01	0.5	0.445	0.029	0.8813	2209	53	2360	120
ns-spot-Ples-10	7.89	0.54	0.459	0.028	0.82561	2204	53	2420	120
ns-spot-Ples-11	9.51	0.53	0.555	0.03	0.9645	2363	50	2820	130
ns-spot-Ples-12	9.45	0.61	0.545	0.035	0.97691	2355	57	2770	140
ns-spot-Ples-13	9.35	0.61	0.527	0.038	0.95463	2348	56	2700	150
ns-spot-Ples-14	9.9	0.53	0.574	0.031	0.95701	2398	52	2900	130
ns-spot-Ples-15	9.09	0.52	0.524	0.03	0.94367	2324	51	2690	120
ns-spot-5z-1	8.35	0.46	0.468	0.026	0.82969	2254	47	2460	110
ns-spot-5z-2	8.98	0.66	0.508	0.038	0.86768	2316	62	2620	150
ns-spot-5z-3	8.61	0.48	0.495	0.03	0.79299	2275	48	2570	130
ns-spot-5z-4	9.25	0.58	0.536	0.034	0.92738	2341	57	2740	140
ns-spot-5z-5	8.52	0.73	0.493	0.042	0.9523	2251	68	2550	170
ns-spot-5z-6	8.91	0.47	0.517	0.031	0.88431	2317	50	2660	130
ns-spot-5z-7	7.69	0.58	0.444	0.03	0.80993	2171	62	2350	130
ns-spot-5z-8	8.07	0.65	0.468	0.036	0.90182	2215	63	2450	150
ns-spot-5z-9	8.82	0.5	0.492	0.03	0.90145	2294	52	2560	130
ns-spot-5z-10	8.06	0.55	0.467	0.03	0.84931	2221	53	2450	120
ns-spot-5z-11	9.12	0.53	0.527	0.032	0.95815	2326	52	2710	130
ns-spot-5z-12	8.91	0.61	0.506	0.036	0.97053	2306	57	2620	150
ns-spot-5z-13	9.83	0.61	0.55	0.039	0.966	2389	55	2790	160
ns-spot-5z-14	8.98	0.52	0.508	0.032	0.94834	2314	50	2630	130
ns-spot-5z-15	9.22	0.52	0.526	0.031	0.94916	2334	50	2700	130
ns-spot-4b-1	6.67	0.27	0.378	0.013	0.72283	2057	37	2059	62
ns-spot-4b-2	6.62	0.25	0.377	0.01	0.4777	2058	34	2059	49
ns-spot-4b-3	6.68	0.35	0.376	0.015	0.85188	2058	47	2050	72
ns-spot-4b-4	6.54	0.23	0.374	0.011	0.73039	2069	35	2043	50
ns-spot-4b-5	6.5	0.22	0.371	0.012	0.66283	2037	41	2030	62
ns-spot-4b-6	6.72	0.28	0.378	0.012	0.70983	2062	39	2061	58
ns-spot-4b-7	6.7	0.26	0.368	0.011	0.81652	2062	36	2020	52
ns-spot-4b-8	6.72	0.18	0.379	0.011	0.66565	2070	24	2068	52
ns-spot-4b-9	6.58	0.22	0.377	0.012	0.62257	2053	28	2060	57
ns-spot-4b-10	6.62	0.22	0.377	0.014	0.69055	2059	27	2060	65
ns-spot-4b-11	6.71	0.17	0.374	0.012	0.7233	2069	23	2045	57
ns-spot-4b-12	6.69	0.2	0.373	0.011	0.52647	2065	26	2043	53
ns-lines-Ples-1	6.33	0.26	0.36	0.01	0.62513	2017	36	1981	48
ns-lines-Ples-2	6.28	0.23	0.357	0.011	0.61261	2010	32	1965	51
ns-lines-Ples-3	7.07	0.3	0.388	0.011	0.61424	2112	39	2111	51
ns-lines-Ples-4	6.78	0.23	0.397	0.013	0.56791	2078	31	2152	62
ns-lines-Ples-5	6.55	0.22	0.382	0.016	0.7416	2048	30	2081	72
ns-lines-Ples-6	6.36	0.19	0.366	0.013	0.14595	2030	29	2009	63
ns-lines-Ples-7	6.8	0.23	0.383	0.012	0.24724	2081	30	2087	54
ns-lines-Ples-8	6.77	0.24	0.387	0.012	0.51506	2077	32	2108	54
ns-lines-Ples-9	6.49	0.2	0.364	0.01	0.74802	2047	29	1999	47
ns-lines-Ples-10	5.95	0.22	0.3431	0.0077	0.44778	1963	33	1900	37
ns-lines-Ples-11	6.56	0.29	0.374	0.011	0.45426	2046	39	2047	54
ns-lines-Ples-12	6.64	0.34	0.38	0.011	0.51222	2054	46	2074	53
ns-lines-Ples-13	6.88	0.39	0.39	0.013	0.42603	2083	49	2119	61
ns-lines-Ples-14	6.69	0.34	0.392	0.015	0.5988	2061	44	2127	71
ns-lines-5z-1	6.15	0.25	0.352	0.01	0.64309	1990	36	1943	49
ns-lines-5z-2	6.09	0.23	0.349	0.011	0.62661	1983	33	1926	51
ns-lines-5z-3	6.85	0.29	0.379	0.011	0.62224	2085	38	2070	51
ns-lines-5z-4	6.56	0.23	0.388	0.014	0.60336	2049	31	2110	64
ns-lines-5z-5	6.35	0.22	0.373	0.015	0.74955	2021	30	2041	72
ns-lines-5z-6	6.22	0.21	0.358	0.013	0.1363	2004	29	1971	61
ns-lines-5z-7	6.59	0.23	0.374	0.012	0.30289	2053	31	2046	55
ns-lines-5z-8	6.57	0.24	0.379	0.012	0.5354	2049	33	2068	54
ns-lines-5z-9	6.29	0.2	0.356	0.01	0.76408	2019	31	1959	48
ns-lines-5z-10	5.76	0.21	0.3351	0.0073	0.41875	1935	32	1862	35
ns-lines-5z-11	6.35	0.28	0.366	0.011	0.47399	2018	39	2007	54
ns-lines-5z-12	6.44	0.34	0.372	0.011	0.52825	2026	47	2035	53
ns-lines-5z-13	6.65	0.38	0.381	0.013	0.44855	2054	49	2078	61
ns-lines-5z-14	6.48	0.33	0.383	0.015	0.60689	2032	45	2087	71
ns-lines-4b-1	6.72	0.28	0.382	0.01	0.64477	2068	36	2083	48
ns-lines-4b-2	6.66	0.25	0.379	0.011	0.61193	2062	33	2069	54
ns-lines-4b-3	7.5	0.32	0.412	0.012	0.63429	2166	39	2222	53
ns-lines-4b-4	7.19	0.25	0.423	0.014	0.59459	2131	31	2269	62
ns-lines-4b-5	6.97	0.24	0.407	0.016	0.7204	2102	30	2195	74
ns-lines-4b-6	6.77	0.21	0.39	0.014	0.14215	2085	29	2120	67
ns-lines-4b-7	7.24	0.25	0.408	0.012	0.22788	2137	31	2204	54
ns-lines-4b-8	7.21	0.26	0.413	0.012	0.48548	2133	32	2228	57
ns-lines-4b-9	6.92	0.21	0.389	0.01	0.71178	2103	30	2116	48
ns-lines-4b-10	6.35	0.23	0.3676	0.0089	0.44313	2020	33	2016	42
ns-lines-4b-11	7.01	0.31	0.401	0.012	0.45611	2104	39	2172	56
ns-lines-4b-12	7.1	0.37	0.407	0.012	0.47783	2113	47	2200	57
ns-lines-4b-13	7.35	0.41	0.419	0.014	0.42729	2143	49	2251	62
ns-lines-4b-14	7.16	0.36	0.421	0.016	0.58354	2121	45	2259	74
fs-spot-Ples-1	8	0.2	0.4514	0.0061	0.34799	2228	21	2400	27
fs-spot-Ples-2	7.6	0.1	0.4309	0.0037	0.16248	2183	12	2309	17
fs-spot-Ples-3	7.45	0.35	0.415	0.012	0.22774	2144	45	2231	57
fs-spot-Ples-4	6.48	0.56	0.357	0.012	0.17432	1962	84	1963	56
fs-spot-Ples-5	7.34	0.12	0.4182	0.0045	0.39108	2152	14	2254	20
fs-spot-Ples-6	7.59	0.16	0.4306	0.0044	0.064441	2181	18	2308	20
fs-spot-Ples-7	7.61	0.13	0.4294	0.0051	0.43324	2182	16	2305	22
fs-spot-Ples-8	6.38	0.37	0.355	0.012	0.26343	1997	53	1951	56
fs-spot-Ples-9	7.51	0.1	0.4198	0.0045	0.33099	2173	13	2261	20
fs-spot-Ples-10	7.402	0.093	0.4127	0.0038	0.26773	2159	11	2227	17
fs-spot-Ples-11	7.43	0.16	0.4206	0.0056	0.25718	2165	20	2266	27
fs-spot-Ples-12	7.31	0.1	0.4152	0.0041	0.38955	2147	13	2238	19
fs-spot-Ples-13	6.77	0.38	0.392	0.013	0.39264	2073	47	2125	59
fs-spot-Ples-14	7.27	0.11	0.4094	0.0049	0.42417	2145	13	2214	22
fs-spot-Ples-15	7.42	0.12	0.4172	0.0036	0.33827	2163	14	2247	17
fs-spot-5z-1	7.51	0.18	0.4371	0.006	0.33098	2172	21	2336	27
fs-spot-5z-2	7.2	0.11	0.4167	0.0036	0.26096	2134	13	2245	16
fs-spot-5z-3	7.06	0.33	0.401	0.012	0.26869	2095	46	2168	55
fs-spot-5z-4	6.14	0.54	0.345	0.011	0.1911	1916	84	1906	55
fs-spot-5z-5	6.9	0.12	0.4046	0.0043	0.48	2098	16	2189	20
fs-spot-5z-6	7.13	0.15	0.4165	0.0043	0.059091	2126	18	2244	20
fs-spot-5z-7	7.16	0.13	0.4152	0.0049	0.52019	2128	17	2241	21
fs-spot-5z-8	6.06	0.36	0.342	0.011	0.30224	1951	54	1893	55
fs-spot-5z-9	7.07	0.1	0.4063	0.0041	0.4357	2120	13	2197	19
fs-spot-5z-10	6.961	0.094	0.3989	0.0035	0.40133	2104	12	2163	16
fs-spot-5z-11	7	0.16	0.4063	0.0054	0.30903	2111	21	2197	25
fs-spot-5z-12	6.88	0.11	0.4011	0.0039	0.47304	2093	14	2173	18
fs-spot-5z-13	6.41	0.36	0.378	0.012	0.43563	2024	48	2062	57
fs-spot-5z-14	6.84	0.12	0.3953	0.0047	0.52514	2093	15	2149	21
fs-spot-5z-15	6.98	0.12	0.4027	0.0035	0.43462	2110	14	2181	16
fs-spot-4b-1	6.62	0.14	0.3758	0.0042	0.17066	2060	18	2056	20
fs-spot-4b-2	6.53	0.11	0.3766	0.0038	0.51839	2048	15	2060	18
fs-spot-4b-3	6.6	0.3	0.3785	0.0093	0.030422	2040	42	2066	44
fs-spot-4b-4	6.567	0.076	0.3767	0.0032	0.2922	2054	10	2061	15
fs-spot-4b-5	6.548	0.081	0.3768	0.0029	0.25568	2052	11	2061	13
fs-spot-4b-6	6.506	0.062	0.3762	0.003	0.3391	2046.2	8.4	2058	14
fs-spot-4b-7	6.496	0.07	0.3775	0.0032	0.38189	2044.4	9.5	2064	15
fs-spot-4b-8	6.503	0.08	0.3757	0.0031	0.27876	2046	11	2056	14
fs-spot-4b-9	6.52	0.13	0.3772	0.0046	0.56259	2046	17	2063	21
fs-spot-4b-10	6.488	0.089	0.3758	0.003	0.29244	2044	12	2056	14
fs-spot-4b-11	6.535	0.097	0.3773	0.0029	0.27761	2049	13	2063	13
fs-spot-4b-12	6.48	0.1	0.3757	0.0035	0.20252	2042	14	2059	15
fs-line-Ples-1	7.36	0.14	0.4156	0.0044	0.31732	2158	18	2240	13
fs-line-Ples-2	7.45	0.17	0.4228	0.004	0.36493	2164	20	2273	10
fs-line-Ples-3	7.37	0.17	0.4216	0.0048	0.40352	2158	21	2267	16
fs-line-Ples-4	7.07	0.17	0.4032	0.005	0.45874	2116	21	2183	18
fs-line-Ples-5	7.53	0.19	0.4276	0.0044	0.41934	2173	22	2295	13
fs-line-Ples-6	7.47	0.16	0.428	0.0049	0.42946	2170	20	2296	16
fs-line-Ples-7	7.71	0.16	0.4344	0.0041	0.31572	2195	19	2325.5	9.5
fs-line-Ples-8	7.27	0.17	0.412	0.0048	0.52309	2142	20	2224	16
fs-line-Ples-9	7.44	0.16	0.4195	0.0049	0.27208	2163	19	2258	16
fs-line-Ples-10	7.4	0.18	0.4193	0.0044	0.40366	2158	22	2257	13
fs-line-Ples-11	7.12	0.16	0.4063	0.0042	0.50736	2127	20	2198	13
fs-line-Ples-12	7.34	0.15	0.4105	0.0046	0.38689	2155	19	2217	15
fs-line-Ples-13	7.53	0.15	0.4244	0.0057	0.36871	2178	18	2280	20
fs-line-Ples-14	7.33	0.17	0.4131	0.0057	0.39734	2149	21	2229	21
fs-line-5z-1	6.944	0.066	0.3963	0.0026	0.29546	2103.7	8.4	2152	12
fs-line-5z-2	6.996	0.065	0.4027	0.0022	0.037269	2110.5	8.3	2181	10
fs-line-5z-3	6.948	0.083	0.401	0.0031	0.23869	2104	11	2173	14
fs-line-5z-4	6.623	0.079	0.3835	0.0035	0.36802	2062	10	2092	16
fs-line-5z-5	7.049	0.083	0.4074	0.0026	0.33228	2117	10	2203	12
fs-line-5z-6	6.995	0.084	0.4072	0.0031	0.019167	2110	11	2202	14
fs-line-5z-7	7.203	0.067	0.4138	0.002	0.17543	2136.4	8.3	2232.2	9.2
fs-line-5z-8	6.785	0.064	0.3932	0.0035	0.49162	2083.2	8.3	2137	16
fs-line-5z-9	6.914	0.071	0.3994	0.0031	0.12368	2102.2	8.1	2166	14
fs-line-5z-10	6.888	0.075	0.3993	0.0025	0.17629	2096.4	9.7	2166	12
fs-line-5z-11	6.635	0.047	0.3867	0.0023	0.67577	2065	6.7	2108	11
fs-line-5z-12	6.85	0.072	0.392	0.0032	0.38543	2091.5	9.3	2132	15
fs-line-5z-13	7.002	0.082	0.4033	0.0037	0.23006	2111	10	2184	17
fs-line-5z-14	6.792	0.074	0.3927	0.0038	0.5282	2084	9.7	2139	20
fs-line-4b-1	6.24	0.059	0.3603	0.0023	0.49672	2009.6	8.4	1983	11
fs-line-4b-2	6.27	0.056	0.3654	0.0019	0.014946	2013.8	7.9	2007.5	9
fs-line-4b-3	6.211	0.074	0.3631	0.0027	0.23342	2005	10	1997	13
fs-line-4b-4	5.904	0.07	0.3465	0.003	0.352	1961	10	1918	14
fs-line-4b-5	6.265	0.071	0.3674	0.0024	0.39671	2012.9	9.9	2017	11
fs-line-4b-6	6.201	0.075	0.3666	0.0028	0.061865	2004	11	2013	13
fs-line-4b-7	6.369	0.06	0.3722	0.0018	0.1296	2027.5	8.2	2039.8	8.4
fs-line-4b-8	5.983	0.055	0.3526	0.0029	0.5084	1972.8	8	1947	14
fs-line-4b-9	6.081	0.065	0.3574	0.0027	0.22358	1989.1	8.4	1970	13
fs-line-4b-10	6.041	0.063	0.3572	0.0024	0.17409	1982.9	8.6	1969	11
fs-line-4b-11	5.796	0.034	0.3453	0.0021	0.79094	1945.6	5.1	1912	10
fs-line-4b-12	5.977	0.063	0.3487	0.0027	0.53233	1971.8	9.1	1928	13
fs-line-4b-13	6.094	0.073	0.3582	0.0032	0.29024	1989	10	1973	15
fs-line-4b-14	5.895	0.063	0.3481	0.0034	0.63907	1959.8	9.3	1925	16
